# Supplementary material for: DNA condensation in live E. coli provides evidence for transertion
Source: Royal Society of Chemistry journal article supplement (doi:10.1039/c6mb00753h), 2017-02-20
Supplement: c6mb00753h1.pdf [file c6mb00753h1.pdf]

## Supporting Information

**TITLE:** DNA Condensation in Live *E. Coli* Provides Evidence for Transertion

**AUTHORS:** A. K. Gorle, A. L. Bottomley, E. J. Harry, J. G. Collins, F. R. Keene and C. E. Woodward

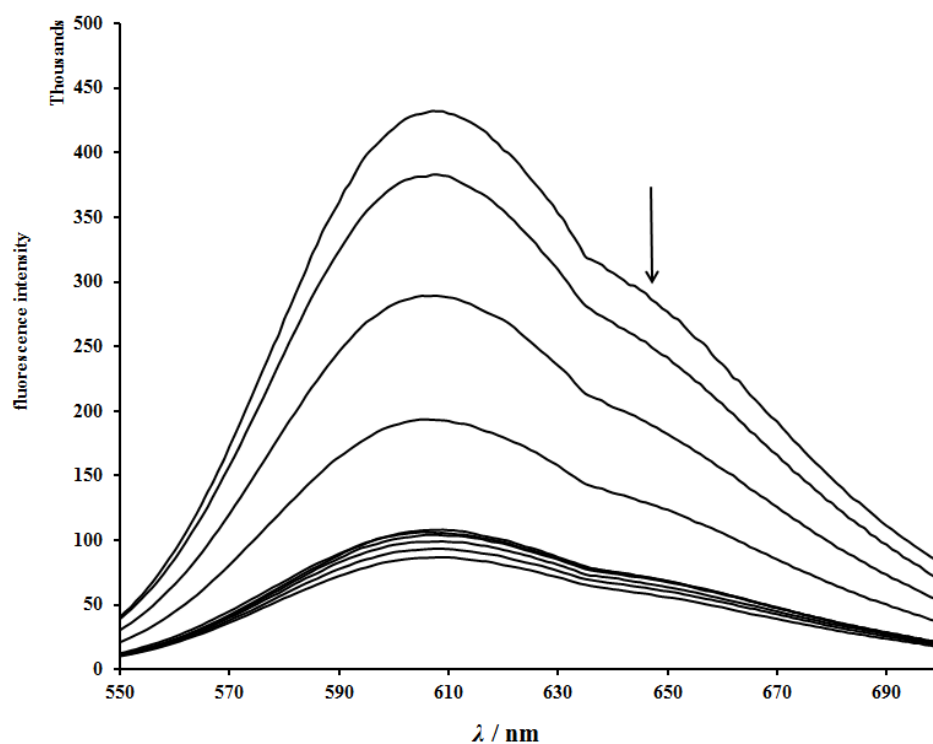

**Figure S1.** Changes in the emission spectra of Rubb<sub>12</sub>-tetra with successive additions of CT-DNA.

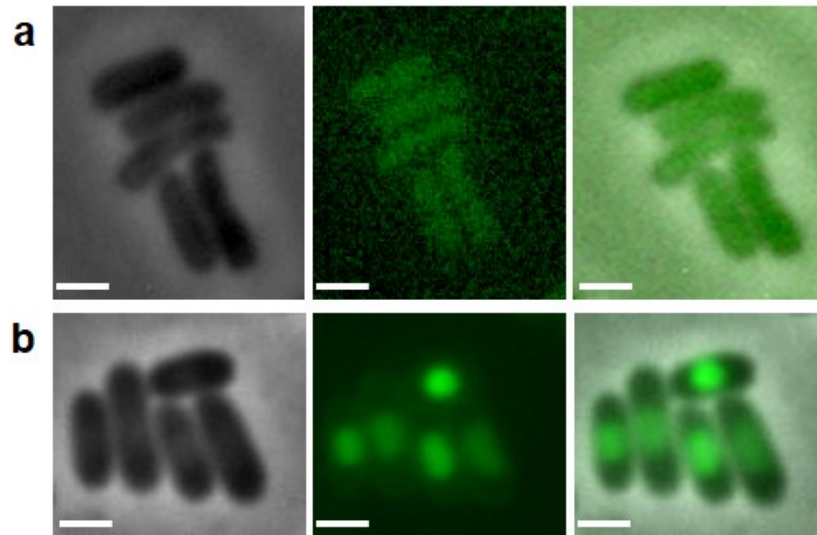

**Figure S2.** Effect of anti-bacterial agents on the nucleoid of the *E. coli* cells in the absence of Rubb<sub>12</sub>-tetra (control experiments). The fluorescence microscopy images are: (a) top panel – control experiment where the cells are treated with Rifampicin (RIF) for 30 minutes and then stained with DAPI; (b) bottom panel – control experiment where the cells are treated with Chloramphenicol (CAM) for 30 minutes and then stained with DAPI. Images from left to right; phase contrast; fluorescence – DAPI (coloured green); and merged (DAPI + phase contrast). Scale bar = 5  $\mu$ m.

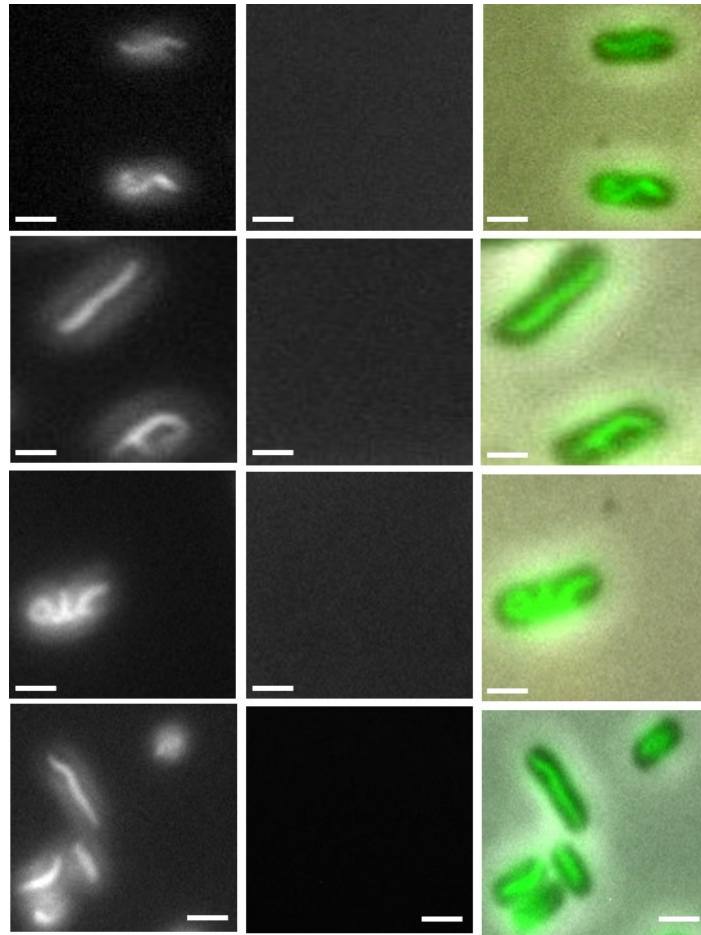

**Figure S3.** Fluorescence microscopic images of rifampicin treated *E. coli* cells incubated with Rubb<sub>12</sub>-tetra for 15 minutes and then stained with DAPI. Images from left to right: fluorescence – DAPI (coloured white); phosphorescence – Rubb<sub>12</sub>-tetra; and merged (DAPI {coloured green} + phosphorescence). Scale bar = 5 μm.

## **Experimental methods**

### ***Materials***

Rubb<sub>12</sub>-tetra was synthesised as described previously.<sup>1</sup> Luria Broth base was purchased from BD Difco. DNA selective stain DAPI (4',6-diamidino-2-phenylindole) was obtained from Molecular Probes, Invitrogen. Rifampicin and chloramphenicol were purchased from Sigma-Aldrich.

### ***Bacterial strains and growth conditions***

As the *E. coli* strain MG1665 was used in a previous study of the intracellular localisation of Rubb<sub>16</sub>,<sup>2</sup> the present study was also carried out using this bacterium. The bacterial strain was grown on Luria Broth (LB) agar plates at 37 °C. A bacterial culture was obtained by inoculating bacteria in LB media and incubating overnight in a shaking incubator at 37 °C. The overnight culture was then diluted to a suspension with an optical density at  $\lambda$ 600 nm (OD<sub>600</sub>) of approximately 0.05. A bacterial log phase culture was obtained by continuing the incubation of this suspension for approximately 2 h until the OD<sub>600</sub> reached 0.5.

### ***MIC assay***

The minimum inhibitory concentration (MIC) of Rubb<sub>12</sub>-tetra against *E. coli* MG1665 was determined by the broth microdilution method as outlined in the CLSI guidelines.<sup>3</sup> The overnight bacterial culture was diluted to a concentration of  $4\sim 8 \times 10^5$  cfu/mL. Rubb<sub>12</sub>-tetra was serially diluted in LB media on a sterile 96-well plate with a final volume of 100  $\mu$ L. The bacterial suspension (100  $\mu$ L) was added to each well and the final concentration range of Rubb<sub>12</sub>-tetra was from 0.125 to 128  $\mu$ g/mL. The plate was then placed in a static incubator at 37 °C for 14-16 h before the MIC results were read.

### ***Drug treatment and staining protocols***

A Rubb<sub>12</sub>-tetra stock solution was prepared in Milli-Q water at a concentration of 128 mg/L. Rubb<sub>12</sub>-tetra was added to the log phase bacterial culture and incubated for either 0.5 h or 1 h. The concentrations of Rubb<sub>12</sub>-tetra used in this study ranged from 0.5×MIC to 2×MIC. After incubation with Rubb<sub>12</sub>-tetra, the cells were washed twice with a phosphate buffer solution before further treatment or preparation for slides. For the co-localisation experiment with DAPI, *E. coli* cells treated with Rubb<sub>12</sub>-tetra were incubated with DAPI at room temperature for 15-30 min before being loaded onto agarose pads on slides for microscopy. The concentrations of DAPI used in the co-localisation assays were 20 mg/L.

Rifampicin and chloramphenicol were initially dissolved in 20 µL of ethanol and then diluted in Milli-Q water to a concentration of 2 mg/mL and 20 mg/mL, respectively. Bacterial cells in the log phase of growth at 37 °C were treated with either of the inhibitors at a concentration of 128 mg/mL for 30 min and then with Rubb<sub>12</sub>-tetra for 15 min.

### ***Live cell microscopy***

All live cell microscopy was performed by placing cells on 2% (w/v) agarose pads (prepared with identical media to that in which the cells were grown) within a 65 µL Gene Frame (Thermo Fisher Scientific). Luminescent images were obtained using a Zeiss Axioplan 2 fluorescence microscope (Carl Zeiss) as described previously.<sup>4,5</sup> DAPI fluorescence and Rubb<sub>12</sub>-tetra phosphorescence were visualised with filter sets 02 and 488015 (Carl Zeiss), respectively. Images were analysed and processed using AxioVision version 4.8 (Carl Zeiss).

### ***Rubb<sub>12</sub>-tetra phosphorescence quenching by calf-thymus DNA (CT-DNA)***

The effect of CT-DNA on the Rubb<sub>12</sub>-tetra phosphorescence was determined by monitoring the Rubb<sub>12</sub>-tetra emission upon successive additions of CT-DNA ( $r = 0.5$  to  $4.5$ ) to an aqueous solution of Rubb<sub>12</sub>-tetra (2 µM; volume 3000 µL).

## References

1. A. K. Gorle, M. Feterl, J. M. Warner, L. Wallace, F. R. Keene and J. G. Collins, *Dalton Trans.*, 2014, **43**, 16713.
2. F. Li, E. J. Harry, A. L. Bottomley, M. D. Edstein, G. W. Birrell, C. E. Woodward, F. R. Keene and J. G. Collins, *Chem. Sci.*, 2014, **5**, 685.
3. P. A. Wayne and Clinical and Laboratory Standards Institute, *Performance Standards for Antimicrobial Susceptibility Testing: Nineteenth Informational Supplement M100–S19*, C.L.S.I., USA, 2009.
4. P. C. Peters, M. D. Migocki, C. Thoni and E. J. Harry, *Mol. Microbiol.*, 2007, **64**, 487.
5. S. Moriya, R. A. Rashid, C. D. Andrade Rodrigues and E. J. Harry, *Mol. Microbiol.*, 2010, **76**, 634.
